# Supplementary material for: RAD51 expression and prognostic impact in patients with stomach adenocarcinoma
Source: PeerJ journal article supplement (doi:10.7717/peerj.19179), 2025-04-11
Supplement: Raw_data_of_RAD51.xlsx [file Raw_data_of_RAD51.xlsx]

## Sheet: Pathological data
Organizational type	Operative time	Survival status	Follow-up time	Survival period	Organizational ID	Tumor surgical organ	Gender	Age	Distant metastasis site	Pathological types	Histological grade	Tumor size	Tumor site	pathomorphology	Degree of infiltration	Invasion of organs	Vascular invasion	perineural invasion	Total number of lymph nodes	positive number	T	N	M	clinical staging	Data from HStmA180Su09: P53 Cancer Nucleu	Data from HStmA180Su09: P53 Cancer Nucleu
Carcinomatous /paracancerous tissues	2009-12-02	Death	2010-03-22	3	D09A3598	Stomach	female	54	Colon,liver	Adenocarcinoma, partially signet ring cell carcinoma	Ⅲ	10*4*1.5	lesser curvature	Diffuse infiltrative type	Subserosal				24	13	T4a	N3a	M1	4	1	0.8
Carcinomatous /paracancerous tissues	2009-12-04	Death	2012-06-01	30	D09A3708	Stomach	male	62		mucinous adenocarcinoma	Ⅲ	7*6.5*3.5	Lesser curvature of the gastric body	Infiltrative ulcer type	Subserosal	omental infiltration	lymphatic		9	3	T4b	N2	M0	3	1	0.9
Carcinomatous /paracancerous tissues	2009-12-24	Death	2010-04-09	4	D09A3723	Stomach	male	72		Adenocarcinoma	Ⅲ	7.5*7*2	Gastric fundus	protruded type	serosa				18	5	T3	N2	M0	3	0	0
Carcinomatous /paracancerous tissues	2009-12-24	Death	2010-09-22	9	D09A3725	Stomach	male	81		Adenocarcinoma	Ⅱ	6*5*1.5	Lesser curvature of the gastric body	Infiltrative ulcer type	serosa				13	4	T3	N2	M0	3	2	0.9
Carcinomatous /paracancerous tissues	2009-12-25	Death	2011-08-16	20	D09A3726	Stomach	male	50		signet-ring cell carcinoma	Ⅲ	10*6*1	Gastric body	Diffuse infiltrative type	serosa		lymphatic		10	8	T3	N3a	M0	3	0	0
Carcinomatous /paracancerous tissues	2009-12-28	Death	2012-08-21	32	D09A3728	Stomach	male	61		Adenocarcinoma	Ⅲ	3*3*1.5	Gastric angle	Infiltrative ulcer type	serosa				12	9	T3	N3a	M0	3	3	0.9
Carcinomatous /paracancerous tissues	2010-01-04	Survival	2016-06-06	77	D09A3796	Stomach	male	79		Adenocarcinoma	Ⅲ	3*2*0.8cm	Lesser curvature of gastric angle	Infiltrative ulcer type	serosa		lymphatic		26	9	T3	N3a	M0	3	3	0.95
Carcinomatous /paracancerous tissues	2010-01-04	Death	2013-07-23	42	D09A3797	Stomach	male	79		Adenocarcinoma	Ⅲ	7*6*1cm	Gastric body	Infiltrative ulcer type	Subserosal		lymphatic	nerve	11	6	T4a	N2	M0	3	3	0.95
Carcinomatous /paracancerous tissues	2010-01-04	Death	2014-08-01	55	D09A3798	Stomach	male	73		Adenocarcinoma	Ⅱ-Ⅲ	3*1.7*1cm	Lesser curvature of the gastric body		submucosa				9	1	T1	N1	M0	1	3	0.85
Carcinomatous /paracancerous tissues	2010-01-06	Survival	2016-06-06	77	D09A3802	Stomach	male	56		Adenocarcinoma	Ⅱ	4.5*2*1cm	Gastric antrum	Ulcerative type	serosa		lymphatic		19	10	T3	N3a	M0	3	1-2	0.95
Carcinomatous /paracancerous tissues	2010-01-11	Survival	2016-06-06	77	D09A3804	Stomach	male	53		Adenocarcinoma	Ⅲ	4*2.5*1.2cm	Lesser curvature of gastric antrum	Infiltrative ulcer type	Subserosal				10	0	T4a	N0	M0	2	1	0.95
Carcinomatous /paracancerous tissues	2010-01-12	Death	2010-12-07	11	D09A3806	Stomach	male	62		signet-ring cell carcinoma	Ⅲ	12*6*1.5cm	Lesser curvature of the gastric body	Diffuse infiltrative type	Subserosal				18	5	T4a	N2	M0	3	1-2	0.9
Carcinomatous /paracancerous tissues	2010-01-13	Death	2011-12-26	23	D09A3808	Stomach	female	44		mucinous adenocarcinoma	Ⅲ	10*10*2cm	Lesser curvature of the gastric body	Diffuse infiltrative type	serosa				27	27	T3	N3b	M0	3	1	0.8
Carcinomatous /paracancerous tissues	2010-01-13	Survival	2016-06-06	77	D09A3809	Stomach	female	62		Adenocarcinoma	Ⅱ	6*5*1cm	Gastric antrum	Infiltrative ulcer type	Subserosal		nerve		15	5	T4a	N2	M0	3	3	1
Carcinomatous /paracancerous tissues	2010-01-18	Survival	2016-06-06	77	D09A3813	Stomach	male	62		Adenocarcinoma	Ⅱ	1.4*1.2*0.8cm	Lesser curvature of gastric antrum	depressed	Mucosal layer				18	0	T1	N0	M0	1	0.5	0.9
Carcinomatous /paracancerous tissues	2010-01-20	Death	2012-05-02	28	D09A3792	Stomach	male	72		Adenocarcinoma	Ⅱ-Ⅲ	6*5*1.5cm	Gastric antrum	Infiltrative ulcer type	serosa				14	0	T3	N0	M0	2	1	0.5
Carcinomatous /paracancerous tissues	2010-01-20	Survival	2016-06-06	77	D09A3815	Stomach	male	52		Adenocarcinoma, partially signet ring cell carcinoma	Ⅲ	3*2.5*1cm	Pyloric duct of stomach	Infiltrative ulcer type	Subserosal		lymphatic	nerve	9	0	T4a	N0	M0	2	2-3	0.95
Carcinomatous /paracancerous tissues	2010-01-22	Survival	2016-06-06	77	D09A3818	Stomach	male	72		Adenocarcinoma	Ⅰ-Ⅱ	2.5*1.5*0.3cm	Gastric angle	depressed	submucosa				12	2	T1	N1	M0	1	0.5	0.8
Carcinomatous /paracancerous tissues	2010-01-22	Death	2014-04-04	51	D09A3819	Stomach	male	75		Adenocarcinoma	Ⅱ	8*5*0.8cm	Lower esophageal cardia	Infiltrative ulcer type	muscularis				9	0	T2	N0	M0	1	0	0
Carcinomatous /paracancerous tissues	2010-01-22	Death	2011-10-20	21	D09A3820	Stomach	unknown	85		Adenocarcinoma	Ⅱ	10*7*1.5cm	Gastric body	Diffuse infiltrative type	serosa				17	3	T3	N2	M0	3	2	0.9
Carcinomatous /paracancerous tissues	2010-01-22	Death	2011-09-13	20	D09A3822	Stomach	male	52		Adenocarcinoma	Ⅲ	10*7*1.5cm	Lesser curvature of the gastric body	Diffuse infiltrative type	Serosal layer	omental infiltration	lymphatic		16	16	T4b	N3b	M0	3	1	0.95
Carcinomatous /paracancerous tissues	2010-01-27	Death	2012-03-05	26	D09A3823	Stomach	male	79		Adenocarcinoma	Ⅰ-Ⅱ	8*6.5*2cm	lesser curvature	Infiltrative ulcer type	serosa				14	4	T3	N2	M0	3	2	0.95
Carcinomatous /paracancerous tissues	2010-01-27	Death	2010-04-22	3	D09A3824	Stomach	male	73		Adenocarcinoma	Ⅲ	10*7*1cm	Stomach	Diffuse infiltrative type	Serosal layer	omental infiltration	lymphatic	nerve	27	24	T4b	N3b	M0	3	0.5	0.3
Carcinomatous /paracancerous tissues	2010-01-29	Survival	2016-06-06	77	D09A3825	Stomach	female	73		High grade intraepithelial tumor, malignant transformation	Ⅰ-Ⅱ	4.5*2.5*2cm	Lesser curvature of gastric antrum	protruded type					6	0	T1	N0	M0	1	1	0.8
Carcinomatous /paracancerous tissues	2010-01-29	Survival	2016-06-06	77	D09A3826	Stomach	male	58		Adenocarcinoma	Ⅰ-Ⅲ级	2.5*2*1cm	Gastric antrum	Ulcerative type	muscularis				17	0	T2	N0	M0	1	3	0.95
Carcinomatous /paracancerous tissues	2010-02-01	Death	2010-06-18	4	D09A3768	Stomach	male	81		Adenocarcinoma	Ⅲ	10*10*1.5cm	Gastric antrum	Infiltrative ulcer type	full-thickness		nerve		8	0	T3	N0	M0	2	1-2	0.9
Carcinomatous /paracancerous tissues	2010-02-03	Death	2013-02-25	36	D09A3769	Stomach	male	57		Adenocarcinoma, partially signet ring cell carcinoma	Ⅲ	10*6*2cm	Gastric antrum	Infiltrative ulcer type	serosa	omental infiltration			21	0	T4b	N0	M0	3	2-3	0.9
Carcinomatous /paracancerous tissues	2010-02-04	Death	2012-01-24	23	D09A3771	Stomach	male	83		Adenocarcinoma	Ⅲ	9*7*1cm	Gastric antrum	Infiltrative ulcer type	full-thickness				14	4	T3	N2	M0	3	1	0.6
Carcinomatous /paracancerous tissues	2010-02-05	Survival	2016-06-06	76	D09A3773	Stomach	male	66		Adenocarcinoma	Ⅱ	4*3.2*1cm	Gastric cardia	Infiltrative ulcer type	muscularis				6	1	T2	N1	M0	2	3	0.95
Carcinomatous /paracancerous tissues	2010-02-05	Survival	2016-06-06	76	D09A3774	Stomach	male	58		Adenocarcinoma	Ⅱ-Ⅲ	2.5*1.5*1cm	Pylorus of gastric antrum	Infiltrative ulcer type	full-thickness				12	0	T3	N0	M0	2	1	0.1
Carcinomatous /paracancerous tissues	2010-02-08	Death	2014-04-27	50	D09A3775	Stomach	male	45		Adenocarcinoma, partially signet ring cell carcinoma	Ⅲ	6*5*1cm	Lesser curvature of the gastric body	Infiltrative ulcer type	Subserosal				19	15	T4a	N3a	M0	3	1	0.9
Carcinomatous /paracancerous tissues	2010-02-08	Death	2010-03-25	1	D09A3777	Stomach	female	83		signet-ring cell carcinoma	Ⅲ	4*2*2cm	Lesser curvature of the gastric body	Infiltrative ulcer type	Subserosal	Cancer nodules are observed in the transverse mesentery of the colon	lymphatic		13	11	T4b	N3a	M0	3	0.5	0.6
Carcinomatous /paracancerous tissues	2010-02-08	Survival	2016-06-06	76	D09A3778	Stomach	female	52		Adenocarcinoma	Ⅱ-Ⅲ	3*3*0.8cm	Lesser curvature of gastric antrum	Infiltrative ulcer type	muscularis				16	5	T2	N2	M0	2	3	0.95
Carcinomatous /paracancerous tissues	2010-02-09	Survival	2016-06-06	76	D09A3779	Stomach	male	72		Adenocarcinoma	Ⅲ	2.5*2*1cm	Gastric body	Infiltrative ulcer type	muscularis				9	0	T2	N0	M0	1	2-3	0.95
Carcinomatous /paracancerous tissues	2010-02-09	Survival	2016-06-06	76	D09A3780	Stomach	female	60		Adenocarcinoma	Ⅱ-Ⅲ	2.5*2.5*1cm	Lesser curvature of gastric antrum	Infiltrative ulcer type	muscularis				14	0	T2	N0	M0	1	1/3	0.95
Carcinomatous /paracancerous tissues	2010-02-09	Survival	2016-06-06	76	D09A3781	Stomach	female	59		Adenocarcinoma	Ⅲ	6*4*1.5cm	Gastric antrum	Infiltrative ulcer type	full-thickness				18	6	T3	N2	M0	3	1-2	0.1
Carcinomatous /paracancerous tissues	2010-02-11	Death	2010-05-11	3	D09A3963	Stomach	male	58		Adenocarcinoma	Ⅲ	5*4*2	Gastric antrum	Ulcer infiltrative type	full-thickness	Infiltrate the entire layer and invade the colon	lymphatic	nerve	14	5	T4b	N2	M0	3	0	0
Carcinomatous /paracancerous tissues	2010-02-12	Survival	2016-06-06	76	D09A3784	Stomach	male	69		Adenocarcinoma	Ⅱ-Ⅲ	4*2*1.5cm	Gastric antrum	Infiltrative ulcer type	full-thickness				11	2	T3	N1	M0	2	3	0.95
Carcinomatous /paracancerous tissues	2010-02-12	Survival	2016-06-06	76	D09A3786	Stomach	male	68		Adenocarcinoma	Ⅱ-Ⅲ	4*4*0.5cm	Gastric body	protruded type	serosa				11	0	T3	N0	M0	2	1-2	0.8
Carcinomatous /paracancerous tissues	2010-02-21	Survival	2016-06-06	76	D09A3767	Stomach	male	54		Adenocarcinoma	Ⅱ-Ⅲ		Gastric antrum	Infiltrative ulcer type	muscularis		lymphatic		13	6	T2	N2	M0	2	3	0.95
Carcinomatous /paracancerous tissues	2010-02-22	Death	2011-07-13	17	D09A3788	Stomach	male	80		Adenocarcinoma	Ⅲ	3.5*3*0.7cm	Gastric cardia	Infiltrative ulcer type	Subserosal				14	3	T4a	N2	M0	3	3	0.95
Carcinomatous /paracancerous tissues	2010-03-05	Death	2010-03-22	0.55	D09A3971	Stomach	male	71		Adenocarcinoma	Ⅲ	6.5*5*1.5	Lesser curvature of gastric antrum	Ulcer infiltrative type			lymphatic	nerve	17	16		N3b	M0	3	1	0.9
Carcinomatous /paracancerous tissues	2010-03-12	Death	2011-09-17	18	D09A3975	Stomach	male	82		Signet ring cell carcinoma, partial mucinous adenocarcinoma	Ⅲ	4*3*1.5	Great curvature of gastric antrum	Ulcer infiltrative type	serosa				18	12	T3	N3a	M0	3	0.5	0.3
Carcinomatous /paracancerous tissues	2010-03-12	Survival	2016-06-06	75	D09A3976	Stomach	male	46		Adenocarcinoma	Ⅱ-Ⅲ	4*3*1	Gastric cardia	Ulcer infiltrative type	muscularis				24	0	T2	N0	M0	1	1/3	0.9
Carcinomatous /paracancerous tissues	2010-03-18	Survival	2016-06-06	75	D09A3980	Stomach	male	47		Adenocarcinoma	Ⅰ-Ⅱ	3*3*0.7	Gastric antrum	Ulcerative type	muscularis				3	0	T2	N0	M0	1	2	0.8
Carcinomatous /paracancerous tissues	2010-03-22	Death	2010-12-18	9	D09A3983	Stomach	male	61		Adenocarcinoma	Ⅱ	4*2*1.5	Gastric antrum	Ulcerative type	serosa				7	0	T3	N0	M0	2	0	0
Carcinomatous /paracancerous tissues	2010-03-24	Death	2014-10-16	55	D09A3988	Stomach	male	79		Adenocarcinoma	Ⅱ	6*5*1.8	Gastric antrum	Ulcer infiltrative type	serosa				12	5	T3	N2	M0	3	1-2	0.95
Carcinomatous /paracancerous tissues	2010-03-26	Survival	2016-06-06	75	D09A3989	Stomach	female	64		Adenocarcinoma, partially signet ring cell carcinoma	Ⅲ	1.5*1*0.8	Gastric antrum	Ulcer infiltrative type	full-thickness			nerve	8	0	T3	N0	M0	2	2	0.6
Carcinomatous /paracancerous tissues	2010-04-01	Death	2010-04-09	0.27	D09A4749	Stomach	male	84		Adenocarcinoma	Ⅲ	8*4.5*1.2	Gastric body	Ulcer infiltrative type					16	15		N3a	M0	3	1	0.9
Carcinomatous /paracancerous tissues	2010-04-07	Death	2010-05-11	1	D09A4136	Stomach	male	59		Adenocarcinoma	Ⅱ-Ⅲ	6*5*2	Gastric antrum	Ulcerative type	serosa				23	18	T3	N3b	M0	3	0.5	0.9
Carcinomatous /paracancerous tissues	2010-04-16	Survival	2016-06-06	74	D09A4141	Stomach	male	58		Adenocarcinoma	Ⅱ	4*3.8*1.8	Gastric antrum	Ulcer infiltrative type					18	0		N0	M0		3	0.95
Carcinomatous /paracancerous tissues	2010-04-16	Death	2010-08-15	4	D09A4144	Stomach	male	78	liver	Adenocarcinoma	Ⅱ	2.5*2.5*0.8	lesser curvature	Ulcerative type	muscularis				13	1	T2	N1	M1	4	1	0.9
Carcinomatous /paracancerous tissues	2010-04-16	Death	2011-05-10	13	D09A4145	Stomach	female	75		Adenocarcinoma	Ⅱ-Ⅲ	8*6*3	lesser curvature	protruded type					29	10		N3a	M0	3	0	0
Carcinomatous /paracancerous tissues	2010-04-26	Death	2011-07-25	15	D09A4154	Stomach	male	74		Adenocarcinoma	Ⅱ	8*6.5*1	Lesser curvature of gastric angle	Ulcer infiltrative type	serosa				32	9	T3	N3a	M0	3	1	0.7
Carcinomatous /paracancerous tissues	2010-04-26	Survival	2016-06-06	74	D09A4155	Stomach	male	49		Adenocarcinoma	Ⅱ-Ⅲ	3*3*1.8	Stomach	Ulcer infiltrative type	serosa				19	2	T3	N1	M0	2	3	1
Carcinomatous /paracancerous tissues	2010-04-29	Death	2011-09-27	17	D09A4156	Stomach	male	69		signet-ring cell carcinoma	Ⅲ	5*5*1.5	Gastric antrum	Ulcer infiltrative type	serosa				13	2	T3	N1	M0	2	1-2	0.9
Carcinomatous /paracancerous tissues	2010-05-05	Death	2015-07-10	62	D09A4158	Stomach	female	74		Adenocarcinoma	Ⅰ-Ⅱ	4.5*4.5*1	Gastric cardia	protruded type	muscularis				7	1	T2	N1	M0	2	1	0.8
Carcinomatous /paracancerous tissues	2010-05-10	Death	2012-11-29	30	D09A4276	Stomach	male	81		Adenocarcinoma	Ⅲ	3*2*1.5	Gastric antrum	Ulcer infiltrative type	serosa				10	0	T3	N0	M0	2	3	0.95
Carcinomatous /paracancerous tissues	2010-05-11	Death	2012-05-08	24	D09A4279	Stomach	male	63		Adenocarcinoma	Ⅲ	4*4*1.5	cardia	Ulcer infiltrative type	serosa				6	2	T3	N1	M0	2	0	0
Carcinomatous /paracancerous tissues	2010-05-11	Survival	2016-06-06	73	D09A4280	Stomach	male	73		Adenocarcinoma	Ⅲ	5*4*1	cardia	Ulcer infiltrative type	serosa				10	4	T3	N2	M0	3	3	1
Carcinomatous /paracancerous tissues	2010-05-11	Death	2014-03-13	46	D09A4281	Stomach	male	75		Adenocarcinoma	Ⅱ	5.5*5*2	Gastric antrum	Ulcer infiltrative type	serosa				31	4	T3	N2	M0	3	2-3	0.95
Carcinomatous /paracancerous tissues	2010-05-13	Death	2011-09-01	16	D09A4282	Stomach	male	68		Adenocarcinoma	Ⅱ-Ⅲ	8*6*2	Gastric body	Ulcer infiltrative type	Subserosal		lymphatic	nerve	31	29	T4a	N3b	M0	3	1-2	0.4
Carcinomatous /paracancerous tissues	2010-05-14	Survival	2016-06-06	73	D09A4284	Stomach	female	75		Adenocarcinoma	Ⅱ	5*5*1	Lesser curvature of gastric antrum	Ulcer infiltrative type	serosa				34	0	T3	N0	M0	2	1-2	0.9
Carcinomatous /paracancerous tissues	2010-05-19	Survival	2016-06-06	73	D09A4287	Stomach	male	78		Adenocarcinoma	Ⅲ	5.5*1.5*1.2	Gastric cardia	Ulcer infiltrative type	Subserosal				19	3	T4a	N2	M0	3	0	0
Carcinomatous /paracancerous tissues	2010-05-19	Death	2013-04-15	35	D09A4288	Stomach	male	77		Adenocarcinoma	Ⅱ	6*5*2.2	Gastric antrum	Ulcer infiltrative type					5	3		N2	M0		1	0.8
Carcinomatous /paracancerous tissues	2010-05-20	Death	2010-10-15	5	D09A4290	Stomach	female	86		Adenocarcinoma, partially mucinous adenocarcinoma	Ⅱ-Ⅲ	8.5*7*1.5	Lesser curvature of gastric antrum	Ulcer infiltrative type					10	10		N3a	M0	3	1-2	0.8
Carcinomatous /paracancerous tissues	2010-05-24	Death	2012-10-22	29	D09A4291	Stomach	male	83		Adenocarcinoma	Ⅱ	6.5*4.5*1	Gastric cardia	Ulcer infiltrative type					2	2		N1	M0		0.5	0.1
Carcinomatous /paracancerous tissues	2010-05-25	Death	2014-08-26	51	D09A4292	Stomach	female	70		Adenocarcinoma	Ⅱ-Ⅲ	5*5*1.5	Gastric cardia	protruded type					24	6		N2	M0		0.5	0.1
Carcinomatous /paracancerous tissues	2010-05-26	Death	2010-08-16	3	D09A4293	Stomach	male	68		Adenocarcinoma	Ⅱ-Ⅲ	5.2*5.2*1.5	Gastric cardia	protruded type	full-thickness			nerve	15	0	T3	N0	M0	2	3	1
Carcinomatous /paracancerous tissues	2010-05-28	Death	2012-04-24	23	D09A4298	Stomach	male	76		Adenocarcinoma	Ⅱ-Ⅲ	7.5*7*2	Gastric cardia	Ulcer infiltrative type					7	2		N1	M0		0.5	0.3
Carcinomatous /paracancerous tissues	2010-05-28	Death	2011-03-28	10	D09A4302	Stomach	female	57		Adenocarcinoma	Ⅲ	5.5*3*1	Lesser curvature of gastric antrum	Ulcer infiltrative type	full-thickness				14	11	T3	N3a	M0	3	0	0
Carcinomatous /paracancerous tissues	2010-05-31	Death	2011-02-08	9	D09A4299	Stomach	male	71		Adenocarcinoma	Ⅲ	10*10*1	Lesser curvature of gastric angle	Ulcer infiltrative type	serosa		lymphatic		32	25	T3	N3b	M0	3	3	0.95
Carcinomatous /paracancerous tissues	2010-06-01	Survival	2016-06-06	72	D09A4305	Stomach	male	58		Adenocarcinoma	Ⅱ	6*5*1.7	Gastric antrum	Ulcer infiltrative type	serosa				59	14	T3	N3a	M0	3	2	0.7
Carcinomatous /paracancerous tissues	2010-06-02	Death	2010-08-28	2	D09A4304	Stomach	female	81		mucinous adenocarcinoma	Ⅲ	10.5*9*2	Gastric antrum	Ulcer infiltrative type	Subserosal				4	3	T4a	N2	M0	3	3	0.95
Carcinomatous /paracancerous tissues	2010-06-03	Death	2012-05-30	23	D09A4351	Stomach	female	51		Adenocarcinoma	Ⅲ	4.5*3*1.2	lesser curvature	Ulcer infiltrative type			lymphatic	nerve	30	22		N3b	M0	3	0	0
Carcinomatous /paracancerous tissues	2010-06-04	Survival	2016-06-06	72	D09A4353	Stomach	female	81		Adenocarcinoma	Ⅲ	5*3*1	Gastric antrum body	Ulcer infiltrative type					16	4		N2	M0		1	0.95
Carcinomatous /paracancerous tissues	2010-06-04	Death	2013-01-31	31	D09A4355	Stomach	male	66		Adenocarcinoma	Ⅲ	7*7*2	Gastric body	Ulcer infiltrative type	serosa				15	2	T3	N1	M0	2	1-2	0.9
Carcinomatous /paracancerous tissues	2010-06-04	Death	2014-09-19	51	D09A5341	Stomach	male	70		Adenocarcinoma	Ⅱ		Stomach										M0		2-3	0.95
Carcinomatous /paracancerous tissues	2010-06-08	Death	2011-06-27	12	D09A4357	Stomach	female	79		Adenocarcinoma	Ⅱ	3.5*2.5*1	Gastric antrum	Ulcerative type	muscularis				23	22	T2	N3b	M0	3	1	0.9
Carcinomatous /paracancerous tissues	2010-06-08	Death	2013-02-20	32	D09A4358	Stomach	male	72		Adenocarcinoma	Ⅱ	8.5*7.5*3	Lesser curvature of the gastric body	Ulcer infiltrative type					22	10		N3a	M0	3	3	1
Carcinomatous /paracancerous tissues	2010-06-08	Death	2010-10-29	4	D09A4359	Stomach	male	64		Adenocarcinoma	Ⅱ	4*3*1.5	Pylorus of stomach	protruded type	serosa				11	2	T3	N1	M0	2	0	0
Carcinomatous /paracancerous tissues	2010-06-08	Death	2011-03-19	9	D09A4360	Stomach	male	76		Adenocarcinoma	Ⅱ-Ⅲ	9*6*1.5	Gastric body	Ulcer infiltrative type	serosa				20	10	T3	N3a	M0	3	2-3	1
Carcinomatous /paracancerous tissues	2010-06-09	Death	2013-03-17	33	D09A4361	Stomach	male	59		Adenocarcinoma, partially mucinous adenocarcinoma	Ⅱ-Ⅲ	7*5.5*1	lesser curvature	Ulcer infiltrative type	serosa			nerve	8	7	T3	N3a	M0	3	3	0.8
Carcinomatous /paracancerous tissues	2010-06-15	Death	2012-07-06	25	D09A4366	Stomach	male	52		Adenocarcinoma	Ⅲ	6*4*1.2	Gastric antrum	Ulcer infiltrative type	serosa	Transverse mesocolon			12	4	T4b	N2	M0	3	3	1
Carcinomatous /paracancerous tissues	2010-06-18	Death	2010-10-20	4	D09A4369	Stomach	male	75		Adenocarcinoma	Ⅲ	9*3*2	Gastric body	protruded type	serosa				2	0	T3	N0	M0	2	0.5	0.2
Carcinomatous /paracancerous tissues	2010-06-22	Death	2010-10-21	4	D09A4370	Stomach	male	65		Adenocarcinoma	Ⅲ	12*5*1.5	cardia	Diffuse infiltrative type	serosa				13	9	T3	N3a	M0	3	1-2	0.1
Carcinomatous /paracancerous tissues	2010-06-23	Survival	2016-06-06	72	D09A4373	Stomach	female	56		Adenocarcinoma	Ⅲ	5*4*1	Lesser curvature of the gastric body	protruded type	full-thickness			nerve	16	0	T3	N0	M0	2	1-2	0.9
Carcinomatous /paracancerous tissues	2010-06-23	Survival	2016-06-06	72	D09A4374	Stomach	male	79		Adenocarcinoma	Ⅱ	3.5*3.5*1	Gastric antrum	Ulcer infiltrative type	serosa				23	1	T3	N1	M0	2	1/3	1
Carcinomatous /paracancerous tissues	2010-06-23	Death	2010-10-24	4	D09A4376	Stomach	male	48		Adenocarcinoma	Ⅲ	6*5*1	lesser curvature	protruded type	serosa		lymphatic	nerve	7	7	T3	N3a	M0	3	1	0.9
Carcinomatous /paracancerous tissues	2010-06-28	Death	2011-03-23	9	D09A4380	Stomach	female	80		Adenocarcinoma	Ⅱ	7.5*7*1.5	Gastric antrum	Ulcer infiltrative type					12	0		N0	M0		0	0

## Sheet: HStmA180Su09 array
										BGrcode
		ShGnghGi Outdo Biotech CompGny
		Organize chip array design and production registration form								Ctl No.	JS W-11-01
										Version	1.0
/											193
										Record No
Array number(CGt No.)：		HStmA180Su09
Chip batch number(Lot No.)：		XT16-028
DESCRIPTION：		Survival period of gastric cancer
Organize chip technology personnel (array design):		Zhengyu Ying				Array design date:		2016.10.25
Organize chip technology personnel (array production):						Array production date:
Biological sample library administrator (pathology wax block retrieval):		/				Delivery date:		/
Biological sample library administrator (pathology wax block relocation)		/				Return date:		/
Environmental room temperature:		/				Array fusion steps:		51 ℃ temperature in chamber
sample type：		■human □rat □mice □rabbit
Fixed method：		■formalin □paraformaldehyde □75% alcohol
Total number of cases：		__90__cases
Total points：		__180__points
Array arrangement：		__J__行（G，B，C….Z）×__18__列（1，2，3，…..100）
spot diameter：		□0.6mm □1.0mm ■1.5mm □2.0mm 移位1.8
verify：		□no □yes
Verify sample description：		____/____organization，____/____cancer____/____level，___/___cases
Schematic diagram of array arrangement
Detailed information of the organizational chip
Point position	Wax block number		Organizational type	Pathological classification		Pathological grading	notes
A01	D09A3598-B30-C1		cancer	Gastric adenocarcinoma
A02	D09A3598-B30-P1		paracarinoma tissue	Mucosa	胃底腺粘膜
A03	D09A3708-B30-C1		cancer	Gastric adenocarcinoma
A04	D09A3708-B30-P1		paracarinoma tissue	Mucosa	胃底腺粘膜
A05	D09A3723-B30-C1		cancer	Gastric adenocarcinoma
A06	D09A3723-B30-P1		paracarinoma tissue	Mucosa	胃底腺粘膜
A07	D09A3725-B30-C1		cancer	Gastric adenocarcinoma
A08	D09A3725-B30-P1		paracarinoma tissue	Mucosa	胃底腺粘膜
A09	D09A3726-B30-C1		cancer	Gastric adenocarcinoma
A10	D09A3726-B30-P1		paracarinoma tissue	Mucosa	胃底腺粘膜
A11	D09A3728-B30-C1		cancer	Gastric adenocarcinoma
A12	D09A3728-B30-P1		paracarinoma tissue	Mucosa	胃底腺粘膜
A13	D09A3796-B30-C1		cancer	Gastric adenocarcinoma
A14	D09A3796-B30-P1		paracarinoma tissue	Mucosa	胃底腺粘膜
A15	D09A3797-B30-C1		cancer	Gastric adenocarcinoma
A16	D09A3797-B30-P1		paracarinoma tissue	Mucosa	胃底腺粘膜
A17	D09A3798-B30-C1		cancer	Gastric adenocarcinoma
A18	D09A3798-B30-P1		paracarinoma tissue	Mucosa	胃底腺粘膜
B01	D09A3802-B30-C1		cancer	Gastric adenocarcinoma
B02	D09A3802-B30-P1		paracarinoma tissue	Mucosa	胃底腺粘膜
B03	D09A3804-B30-C1		cancer	Gastric adenocarcinoma
B04	D09A3804-B30-P1		paracarinoma tissue	Mucosa	胃底腺粘膜
B05	D09A3806-B30-C1		cancer	Gastric adenocarcinoma
B06	D09A3806-B30-P1		paracarinoma tissue	Mucosa	胃底腺粘膜
B07	D09A3808-B30-C1		cancer	Gastric adenocarcinoma
B08	D09A3808-B30-P1		paracarinoma tissue	Mucosa	胃底腺粘膜
B09	D09A3809-B30-P1		cancer	Gastric adenocarcinoma
B10	D09A3809-B30-C1		paracarinoma tissue	Mucosa	胃底腺粘膜
B11	D09A3813-B30-C1		cancer	Gastric adenocarcinoma
B12	D09A3813-B30-P1		paracarinoma tissue	Mucosa	胃底腺粘膜
B13	D09A3792-B30-C1		cancer	Gastric adenocarcinoma
B14	D09A3792-B30-P1		paracarinoma tissue	Mucosa	胃底腺粘膜
B15	D09A3815-B30-C1		cancer	Gastric adenocarcinoma
B16	D09A3815-B30-P1		paracarinoma tissue	Mucosa	胃底腺粘膜
B17	D09A3818-B30-C1		cancer	Gastric adenocarcinoma
B18	D09A3818-B30-P1		paracarinoma tissue	Mucosa	胃底腺粘膜
C01	D09A3819-B30-C1		cancer	Gastric adenocarcinoma
C02	D09A3819-B30-P1		paracarinoma tissue	Mucosa	胃底腺粘膜
C03	D09A3820-B30-C1		cancer	Gastric adenocarcinoma
C04	D09A3820-B30-P1		paracarinoma tissue	Mucosa	胃底腺粘膜
C05	D09A3822-B30-C1		cancer	Gastric adenocarcinoma
C06	D09A3822-B30-P1		paracarinoma tissue	Mucosa	胃底腺粘膜
C07	D09A3823-B30-C1		cancer	Gastric adenocarcinoma
C08	D09A3823-B30-P1		paracarinoma tissue	Mucosa	胃底腺粘膜
C09	D09A3824-B30-C1		cancer	Gastric adenocarcinoma
C10	D09A3824-B30-P1		paracarinoma tissue	Mucosa	胃底腺粘膜
C11	D09A3825-B30-C1		cancer	Gastric adenocarcinoma
C12	D09A3825-B30-P1		paracarinoma tissue	Mucosa	胃底腺粘膜
C13	D09A3826-B30-C1		cancer	Gastric adenocarcinoma
C14	D09A3826-B30-P1		paracarinoma tissue	Mucosa	胃底腺粘膜
C15	D09A3768-B30-C1		cancer	Gastric adenocarcinoma
C16	D09A3768-B30-P1		paracarinoma tissue	Mucosa	胃底腺粘膜
C17	D09A3769-B30-C1		cancer	Gastric adenocarcinoma
C18	D09A3769-B30-P1		paracarinoma tissue	Mucosa	胃底腺粘膜
D01	D09A3771-B30-C1		cancer	Gastric adenocarcinoma
D02	D09A3771-B30-P1		paracarinoma tissue	Mucosa	胃底腺粘膜
D03	D09A3773-B30-C1		cancer	Gastric adenocarcinoma
D04	D09A3773-B30-P1		paracarinoma tissue	Mucosa	胃底腺粘膜
D05	D09A3774-B30-C1		cancer	Gastric adenocarcinoma
D06	D09A3774-B30-P1		paracarinoma tissue	Mucosa	胃底腺粘膜
D07	D09A3775-B30-C1		cancer	Gastric adenocarcinoma
D08	D09A3775-B30-P1		paracarinoma tissue	Mucosa	胃底腺粘膜
D09	D09A3777-B30-C1		cancer	Gastric adenocarcinoma
D10	D09A3777-B30-P1		paracarinoma tissue	Mucosa	胃底腺粘膜
D11	D09A3778-B30-C1		cancer	Gastric adenocarcinoma
D12	D09A3778-B30-P1		paracarinoma tissue	Mucosa	胃底腺粘膜
D13	D09A3779-B30-C1		cancer	Gastric adenocarcinoma
D14	D09A3779-B30-P1		paracarinoma tissue	Mucosa	胃底腺粘膜
D15	D09A3780-B30-C1		cancer	Gastric adenocarcinoma
D16	D09A3780-B30-P1		paracarinoma tissue	Mucosa	胃底腺粘膜
D17	D09A3781-B30-C1		cancer	Gastric adenocarcinoma
D18	D09A3781-B30-P1		paracarinoma tissue	Mucosa	胃底腺粘膜
E01	D09A3963-B30-C1		cancer	Gastric adenocarcinoma
E02	D09A3963-B30-P1		paracarinoma tissue	Mucosa	胃底腺粘膜
E03	D09A3784-B30-C1		cancer	Gastric adenocarcinoma
E04	D09A3784-B30-P1		paracarinoma tissue	Mucosa	胃底腺粘膜
E05	D09A3786-B30-C1		cancer	Gastric adenocarcinoma
E06	D09A3786-B30-P1		paracarinoma tissue	Mucosa	胃底腺粘膜
E07	D09A3767-B30-C1		cancer	Gastric adenocarcinoma
E08	D09A3767-B30-P1		paracarinoma tissue	Mucosa	胃底腺粘膜
E09	D09A3788-B30-C1		cancer	Gastric adenocarcinoma
E10	D09A3788-B30-P1		paracarinoma tissue	Mucosa	胃底腺粘膜
E11	D09A3971-B30-C1		cancer	Gastric adenocarcinoma
E12	D09A3971-B30-P1		paracarinoma tissue	Mucosa	胃底腺粘膜
E13	D09A3975-B30-C1		cancer	Gastric adenocarcinoma
E14	D09A3975-B30-P1		paracarinoma tissue	Mucosa	胃底腺粘膜
E15	D09A3976-B30-C1		cancer	Gastric adenocarcinoma
E16	D09A3976-B30-P1		paracarinoma tissue	Mucosa	胃底腺粘膜
E17	D09A3980-B30-C1		cancer	Gastric adenocarcinoma
E18	D09A3980-B30-P1		paracarinoma tissue	Mucosa	胃底腺粘膜
F01	D09A3983-B30-C1		cancer	Gastric adenocarcinoma
F02	D09A3983-B30-P1		paracarinoma tissue	Mucosa	胃底腺粘膜
F03	D09A3988-B30-C1		cancer	Gastric adenocarcinoma
F04	D09A3988-B30-P1		paracarinoma tissue	Mucosa	胃底腺粘膜
F05	D09A3989-B30-C1		cancer	Gastric adenocarcinoma
F06	D09A3989-B30-P1		paracarinoma tissue	Mucosa	胃底腺粘膜
F07	D09A4749-B30-C1		cancer	Gastric adenocarcinoma
F08	D09A4749-B30-P1		paracarinoma tissue	Mucosa	胃底腺粘膜
F09	D09A4136-B30-C1		cancer	Gastric adenocarcinoma
F10	D09A4136-B30-P1		paracarinoma tissue	Mucosa	胃底腺粘膜
F11	D09A4141-B30-C1		cancer	Gastric adenocarcinoma
F12	D09A4141-B30-P1		paracarinoma tissue	Mucosa	胃底腺粘膜
F13	D09A4144-B30-C1		cancer	Gastric adenocarcinoma
F14	D09A4144-B30-P1		paracarinoma tissue	Mucosa	胃底腺粘膜
F15	D09A4145-B30-C1		cancer	Gastric adenocarcinoma
F16	D09A4145-B30-P1		paracarinoma tissue	Mucosa	胃底腺粘膜
F17	D09A4154-B30-C1		cancer	Gastric adenocarcinoma
F18	D09A4154-B30-P1		paracarinoma tissue	Mucosa	胃底腺粘膜
G01	D09A4155-B30-C1		cancer	Gastric adenocarcinoma
G02	D09A4155-B30-P1		paracarinoma tissue	Mucosa	胃底腺粘膜
G03	D09A4156-B30-C1		cancer	Gastric adenocarcinoma
G04	D09A4156-B30-P1		paracarinoma tissue	Mucosa	胃底腺粘膜
G05	D09A4158-B30-C1		cancer	Gastric adenocarcinoma
G06	D09A4158-B30-P1		paracarinoma tissue	Mucosa	胃底腺粘膜
G07	D09A4276-B30-C1		cancer	Gastric adenocarcinoma
G08	D09A4276-B30-P1		paracarinoma tissue	Mucosa	胃底腺粘膜
G09	D09A4279-B30-C1		cancer	Gastric adenocarcinoma
G10	D09A4279-B30-P1		paracarinoma tissue	Mucosa	胃底腺粘膜
G11	D09A4280-B30-C1		cancer	Gastric adenocarcinoma
G12	D09A4280-B30-P1		paracarinoma tissue	Mucosa	胃底腺粘膜
G13	D09A4281-B30-C1		cancer	Gastric adenocarcinoma
G14	D09A4281-B30-P1		paracarinoma tissue	Mucosa	胃底腺粘膜
G15	D09A4282-B30-C1		cancer	Gastric adenocarcinoma
G16	D09A4282-B30-P1		paracarinoma tissue	Mucosa	胃底腺粘膜
G17	D09A4284-B30-C1		cancer	Gastric adenocarcinoma
G18	D09A4284-B30-P1		paracarinoma tissue	Mucosa	胃底腺粘膜
H01	D09A4287-B30-C1		cancer	Gastric adenocarcinoma
H02	D09A4287-B30-P1		paracarinoma tissue	Mucosa	胃底腺粘膜
H03	D09A4288-B30-C1		cancer	Gastric adenocarcinoma
H04	D09A4288-B30-P1		paracarinoma tissue	Mucosa	胃底腺粘膜
H05	D09A4290-B30-C1		cancer	Gastric adenocarcinoma
H06	D09A4290-B30-P1		paracarinoma tissue	Mucosa	胃底腺粘膜
H07	D09A4291-B30-C1		cancer	Gastric adenocarcinoma
H08	D09A4291-B30-P1		paracarinoma tissue	Mucosa	胃底腺粘膜
H09	D09A4292-B30-C1		cancer	Gastric adenocarcinoma
H10	D09A4292-B30-P1		paracarinoma tissue	Mucosa	胃底腺粘膜
H11	D09A4293-B30-C1		cancer	Gastric adenocarcinoma
H12	D09A4293-B30-P1		paracarinoma tissue	Mucosa	胃底腺粘膜
H13	D09A4298-B30-C1		cancer	Gastric adenocarcinoma
H14	D09A4298-B30-P1		paracarinoma tissue	Mucosa	胃底腺粘膜
H15	D09A4302-B30-C1		cancer	Gastric adenocarcinoma
H16	D09A4302-B30-P1		paracarinoma tissue	Mucosa	胃底腺粘膜
H17	D09A4299-B30-C1		cancer	Gastric adenocarcinoma
H18	D09A4299-B30-P1		paracarinoma tissue	Mucosa	胃底腺粘膜
I01	D09A4305-B30-C1		cancer	Gastric adenocarcinoma
I02	D09A4305-B30-P1		paracarinoma tissue	Mucosa	胃底腺粘膜
I03	D09A4304-B30-C1		cancer	Gastric adenocarcinoma
I04	D09A4304-B30-P1		paracarinoma tissue	Mucosa	胃底腺粘膜
I05	D09A4351-B30-C1		cancer	Gastric adenocarcinoma
I06	D09A4351-B30-P1		paracarinoma tissue	Mucosa	胃底腺粘膜
I07	D09A4353-B30-C1		cancer	Gastric adenocarcinoma
I08	D09A4353-B30-P1		paracarinoma tissue	Mucosa	胃底腺粘膜
I09	D09A4355-B30-C1		cancer	Gastric adenocarcinoma
I10	D09A4355-B30-P1		paracarinoma tissue	Mucosa	胃底腺粘膜
I11	D09A5341-B30-C1		cancer	Gastric adenocarcinoma
I12	D09A5341-B30-P1		paracarinoma tissue	Mucosa	胃底腺粘膜
I13	D09A4357-B30-C1		cancer	Gastric adenocarcinoma
I14	D09A4357-B30-P1		paracarinoma tissue	Mucosa	胃底腺粘膜
I15	D09A4358-B30-C1		cancer	Gastric adenocarcinoma
I16	D09A4358-B30-P1		paracarinoma tissue	Mucosa	胃底腺粘膜
I17	D09A4359-B30-C1		cancer	Gastric adenocarcinoma
I18	D09A4359-B30-P1		paracarinoma tissue	Mucosa	胃底腺粘膜
J01	D09A4360-B30-C1		cancer	Gastric adenocarcinoma
J02	D09A4360-B30-P1		paracarinoma tissue	Mucosa	胃底腺粘膜
J03	D09A4361-B30-C1		cancer	Gastric adenocarcinoma
J04	D09A4361-B30-P1		paracarinoma tissue	Mucosa	胃底腺粘膜
J05	D09A4366-B30-C1		cancer	Gastric adenocarcinoma
J06	D09A4366-B30-P1		paracarinoma tissue	Mucosa	胃底腺粘膜
J07	D09A4369-B30-C1		cancer	Gastric adenocarcinoma
J08	D09A4369-B30-P1		paracarinoma tissue	Mucosa	胃底腺粘膜
J09	D09A4370-B30-C1		cancer	Gastric adenocarcinoma
J10	D09A4370-B30-P1		paracarinoma tissue	Mucosa	胃底腺粘膜
J11	D09A4373-B30-C1		cancer	Gastric adenocarcinoma
J12	D09A4373-B30-P1		paracarinoma tissue	Mucosa	胃底腺粘膜
J13	D09A4374-B30-C1		cancer	Gastric adenocarcinoma
J14	D09A4374-B30-P1		paracarinoma tissue	Mucosa	胃底腺粘膜
J15	D09A4376-B30-C1		cancer	Gastric adenocarcinoma
J16	D09A4376-B30-P1		paracarinoma tissue	Mucosa	胃底腺粘膜
J17	D09A4380-B30-C1		cancer	Gastric adenocarcinoma
J18	D09A4380-B30-P1		paracarinoma tissue	Mucosa	胃底腺粘膜
K01	anchor point

## Sheet: Process data organization
Point position	cytosolic intensity	Positive staining rate	cytoplasmic positivity rate group	cytoplasmic total score	If the total score greater than 3	Grade group	Gender	Age>70	Pathological grading	T	T group	N	N group	M	TNM	TNM group	P53	Survival status	Survival
A01	0		0	0	1	2	0	0	3	4	2	3	2	1	4	2	0	0	3
A03	1	1	4	4	2	2	1	0	3	4	2	2	2	0	3	2	1	0	30
A05	0		0	0	1	2	1	1	3	3	2	2	2	0	3	2	0	0	4
A07	1	0.8	4	4	2	1	1	1	2	3	2	2	2	0	3	2	1	0	9
A11	2	1	4	8	2	2	1	0	3	3	2	3	2	0	3	2	1	0	32
A13	1	0.7	3	3	1	2	1	1	3	3	2	3	2	0	3	2	1	1	77
A15	0		0	0	1	2	1	1	3	4	2	2	2	0	3	2	1	0	42
A17	0		0	0	1	1	1	1	2	2	1	1	1	0	1	1	1	0	55
B01	0		0	0	1	1	1	0	2	3	2	3	2	0	3	2	1	1	77
B03	0		0	0	1	2	1	0	3	4	2	0	1	0	2	1	1	1	77
B07	0		0	0	1	2	0	0	3	3	2	3	2	0	3	2	0	0	23
B09	1	1	4	4	2	1	0	0	2	4	2	2	2	0	3	2	1	1	77
B11	0		0	0	1	1	1	0	2	1	1	0	1	0	1	1	0	1	77
B13	0		0	0	1	1	1	1	2	3	2	0	1	0	2	1	0	0	28
B15	1	0.7	3	3	1	2	1	0	3	4	2	0	1	0	2	1	1	1	77
B17	1	0.7	3	3	1	1	1	1	1	1	1	1	1	0	1	1	0	1	77
C01	2	1	4	8	2	1	1	1	2	2	1	0	1	0	1	1	0	0	51
C03	1	1	4	4	2	1		1	2	3	2	2	2	0	3	2	1	0	21
C05	2	1	4	8	2	2	1	0	3	4	2	3	2	0	3	2	1	0	20
C07	1	1	4	4	2	1	1	1	1	3	2	2	2	0	3	2	1	0	26
C09	0		0	0	1	2	1	1	3	4	2	3	2	0	3	2	0	0	3
C11	1	0.75	3	3	1	1	0	1	1	1	1	0	1	0	1	1	0	1	77
C13	2	1	4	8	2	1	1	0	1	2	1	0	1	0	1	1	1	1	77
C15	1	1	4	4	2	2	1	1	3	3	2	0	1	0	2	1	1	0	4
C17	0		0	0	1	2	1	0	3	4	2	0	1	0	3	2	1	0	36
D01	1	0.8	4	4	2	2	1	1	3	3	2	2	2	0	3	2	0	0	23
D03	2	0.25	1	2	1	1	1	0	2	2	1	1	1	0	2	1	1	1	76
D05	0		0	0	1	1	1	0	2	3	2	0	1	0	2	1	0	1	76
D09	0		0	0	1	2	0	1	3	4	2	3	2	0	3	2	0	0	1
D11	0		0	0	1	1	0	0	2	2	1	2	2	0	2	1	1	1	76
D13	0		0	0	1	2	1	1	3	2	1	0	1	0	1	1	1	1	76
D15	1	0.7	3	3	1	1	0	0	2	2	1	0	1	0	1	1	0	1	76
D17	1	1	4	4	2	2	0	0	3	3	2	2	2	0	3	2	0	1	76
E01	0		0	0	1	2	1	0	3	4	2	2	2	0	3	2	0	0	3
E03	2	1	4	8	2	1	1	0	2	3	2	1	1	0	2	1	1	1	76
E05	2	0.7	3	6	2	1	1	0	2	3	2	0	1	0	2	1	0	1	76
E07	1	0.7	3	3	1	1	1	0	2	2	1	2	2	0	2	1	1	1	76
E09	0		0	0	1	2	1	1	3	4	2	2	2	0	3	2	1	0	17
E11	1	1	4	4	2	2	1	1	3			3	2	0	3	2	1	0	55
E13	3	1	4	12	2	2	1	1	3	3	2	3	2	0	3	2	0	0	18
E15	1	0.75	3	3	1	1	1	0	2	2	1	0	1	0	1	1	0	1	75
E17	0		0	0	1	1	1	0	1	2	1	0	1	0	1	1	1	1	75
F01	1	1	4	4	2	1	1	0	2	3	2	0	1	0	2	1	0	0	9
F03	1	0.8	4	4	2	1	1	1	2	3	2	2	2	0	3	2	1	0	55
F05	0		0	0	1	2	0	0	3	3	2	0	1	0	2	1	0	1	75
F07	1	1	4	4	2	2	1	1	3			3	2	0	3	2	1	0	27
F09	0		0	0	1	1	1	0	2	3	2	3	2	0	3	2	0	0	1
F11	3	1	4	12	2	1	1	0	2			0	1	0			1	1	74
F13	3	0.9	4	12	2	1	1	1	2	2	1	1	1	1	4	2	1	0	4
F15	1	1	4	4	2	1	0	1	2			3	2	0	3	2	0	0	13
F17	1	1	4	4	2	1	1	1	2	3	2	3	2	0	3	2	0	0	15
G01	1	0.75	3	3	1	1	1	0	2	3	2	1	1	0	2	1	1	1	74
G03	2	1	4	8	2	2	1	0	3	3	2	1	1	0	2	1	1	0	17
G05	0		0	0	1	1	0	1	1	2	1	1	1	0	2	1	0	0	62
G07	0		0	0	1	2	1	1	3	3	2	0	1	0	2	1	1	0	30
G09	1	1	4	4	2	2	1	0	3	3	2	1	1	0	2	1	0	0	24
G11	1	0.75	3	3	1	2	1	1	3	3	2	2	2	0	3	2	1	1	73
G13	1	1	4	4	2	1	1	1	2	3	2	2	2	0	3	2	1	0	46
G15	0		0	0	1	1	1	0	2	4	2	3	2	0	3	2	0	0	16
G17	1	0.75	3	3	1	1	0	1	2	3	2	0	1	0	2	1	1	1	73
H01	1	1	4	4	2	2	1	1	3	4	2	2	2	0	3	2	0	1	73
H03	1	0.8	4	4	2	1	1	1	2			2	2	0			0	0	35
H05	0		0	0	1	1	0	1	2			3	2	0	3	2	0	0	5
H07	1	1	4	4	2	1	1	1	2			1	1	0			0	0	29
H09	0		0	0	1	1	0	0	2			2	2	0			0	0	51
H11	2	0.7	3	6	2	1	1	0	2	3	2	0	1	0	2	1	1	0	3
H13	0		0	0	1	1	1	1	2			1	1	0			0	0	23
H17	2	1	4	8	2	2	1	1	3	3	2	3	2	0	3	2	1	0	9
I01	0		0	0	1	1	1	0	2	3	2	3	2	0	3	2	1	1	72
I03	2	0.3	2	4	2	2	0	1	3	4	2	2	2	0	3	2	1	0	2
I05	1	0.8	4	4	2	2	0	0	3			3	2	0	3	2	0	0	23
I07	3	1	4	12	2	2	0	1	3			2	2	0			1	1	72
I09	2	1	4	8	2	2	1	0	3	3	2	1	1	0	2	1	1	0	31
I11	2	1	4	8	2	1	1	0	2					0			1	0	51
I13	0		0	0	1	1	0	1	2	2	1	3	2	0	3	2	1	0	12
I15	2	0.5	2	4	2	1	1	1	2			3	2	0	3	2	1	0	32
I17	2	1	4	8	2	1	1	0	2	3	2	1	1	0	2	1	0	0	4
J01	2	1	4	8	2	1	1	1	2	3	2	3	2	0	3	2	1	0	9
J03	0		0	0	1	1	1	0	2	3	2	3	2	0	3	2	1	0	33
J05	2	1	4	8	2	2	1	0	3	4	2	2	2	0	3	2	1	0	25
J07	1	0.8	4	4	2	2	1	1	3	3	2	0	1	0	2	1	0	0	4
J09	1	1	4	4	2	2	1	0	3	3	2	3	2	0	3	2	0	0	4
J11	1	0.75	3	3	1	2	0	0	3	3	2	0	1	0	2	1	1	1	72
J13	0		0	0	1	1	1	1	2	3	2	1	1	0	2	1	0	1	72
J17	1	0.8	4	4	2	1	0	1	2			0	1	0			0	1	9

## Sheet: Data of RAD51
Point position	Organizational type	cytosolic intensity	Positive staining rate	cytoplasmic positivity rate group	cytoplasmic total score	If the total score greater than 3		Point position	Organizational type	cytosolic intensity	Positive staining rate	cytoplasmic positivity rate group	cytoplasmic total score	If the total score greater than 3
A02	paracarinoma tissue	1	0.5	2	2	1		A01	cancer	0		0	0	1
A04	paracarinoma tissue	2	0.4	2	4	2		A03	cancer	1	1	4	4	2
A06	paracarinoma tissue	0		0	0	1		A05	cancer	0		0	0	1
A08	paracarinoma tissue	0		0	0	1		A07	cancer	1	0.8	4	4	2
A12	paracarinoma tissue	0		0	0	1		A11	cancer	2	1	4	8	2
A14	paracarinoma tissue	1	0.7	3	3	1		A13	cancer	1	0.7	3	3	1
A16	paracarinoma tissue	0		0	0	1		A15	cancer	0		0	0	1
A18	paracarinoma tissue	0		0	0	1		A17	cancer	0		0	0	1
B02	paracarinoma tissue	0		0	0	1		B01	cancer	0		0	0	1
B04	paracarinoma tissue	1	1	4	4	2		B03	cancer	0		0	0	1
B08	paracarinoma tissue	0		0	0	1		B07	cancer	0		0	0	1
B10	paracarinoma tissue	0		0	0	1		B09	cancer	1	1	4	4	2
B12	paracarinoma tissue	1	1	4	4	2		B11	cancer	0		0	0	1
B14	paracarinoma tissue	1	1	4	4	2		B13	cancer	0		0	0	1
B16	paracarinoma tissue	1	1	4	4	2		B15	cancer	1	0.7	3	3	1
B18	paracarinoma tissue	1	1	4	4	2		B17	cancer	1	0.7	3	3	1
C02	paracarinoma tissue	1	0.7	3	3	1		C01	cancer	2	1	4	8	2
C04	paracarinoma tissue	1	0.3	2	2	1		C03	cancer	1	1	4	4	2
C06	paracarinoma tissue	2	1	4	8	2		C05	cancer	2	1	4	8	2
C08	paracarinoma tissue	1	1	4	4	2		C07	cancer	1	1	4	4	2
C10	paracarinoma tissue	1	0.8	3	3	1		C09	cancer	0		0	0	1
C12	paracarinoma tissue	1	1	4	4	2		C11	cancer	1	0.75	3	3	1
C14	paracarinoma tissue	1	1	4	4	2		C13	cancer	2	1	4	8	2
C16	paracarinoma tissue	0		0	0	1		C15	cancer	1	1	4	4	2
C18	paracarinoma tissue	1	0.1	1	1	1		C17	cancer	0		0	0	1
D02	paracarinoma tissue	1	0.4	2	2	1		D01	cancer	1	0.8	4	4	2
D04	paracarinoma tissue	0		0	0	1		D03	cancer	2	0.25	1	2	1
D06	paracarinoma tissue	1	0.7	3	3	1		D05	cancer	0		0	0	1
D10	paracarinoma tissue	0		0	0	1		D09	cancer	0		0	0	1
D12	paracarinoma tissue	0		0	0	1		D11	cancer	0		0	0	1
D14	paracarinoma tissue	2	0.2	1	2	1		D13	cancer	0		0	0	1
D16	paracarinoma tissue	1	0.4	2	2	1		D15	cancer	1	0.7	3	3	1
D18	paracarinoma tissue	1	1	4	4	2		D17	cancer	1	1	4	4	2
E02	paracarinoma tissue	1	0.2	1	1	1		E01	cancer	0		0	0	1
E04	paracarinoma tissue	3	0.2	1	3	1		E03	cancer	2	1	4	8	2
E06	paracarinoma tissue	3	0.4	1	3	1		E05	cancer	2	0.7	3	6	2
E08	paracarinoma tissue	1	1	4	4	2		E07	cancer	1	0.7	3	3	1
E10	paracarinoma tissue	1	0.7	3	3	1		E09	cancer	0		0	0	1
E12	paracarinoma tissue	1	1	4	4	2		E11	cancer	1	1	4	4	2
E14	paracarinoma tissue	1	0.3	2	2	1		E13	cancer	3	1	4	12	2
E16	paracarinoma tissue	1	1	4	4	2		E15	cancer	1	0.75	3	3	1
E18	paracarinoma tissue	1	0.7	3	3	1		E17	cancer	0		0	0	1
F02	paracarinoma tissue	2	0.2	1	2	1		F01	cancer	1	1	4	4	2
F04	paracarinoma tissue	0		0	0	1		F03	cancer	1	0.8	4	4	2
F06	paracarinoma tissue	2	0.7	3	6	2		F05	cancer	0		0	0	1
F08	paracarinoma tissue	1	0.8	3	3	1		F07	cancer	1	1	4	4	2
F10	paracarinoma tissue	2	0.9	4	8	2		F09	cancer	0		0	0	1
F12	paracarinoma tissue	1	0.7	3	3	1		F11	cancer	3	1	4	12	2
F14	paracarinoma tissue	1	0.7	3	3	1		F13	cancer	3	0.9	4	12	2
F16	paracarinoma tissue	0		0	0	1		F15	cancer	1	1	4	4	2
F18	paracarinoma tissue	1	1	4	4	2		F17	cancer	1	1	4	4	2
G02	paracarinoma tissue	1	1	4	4	2		G01	cancer	1	0.75	3	3	1
G04	paracarinoma tissue	3	0.5	2	6	2		G03	cancer	2	1	4	8	2
G06	paracarinoma tissue	1	1	4	4	2		G05	cancer	0		0	0	1
G08	paracarinoma tissue	0		0	0	1		G07	cancer	0		0	0	1
G10	paracarinoma tissue	1	0.5	2	2	1		G09	cancer	1	1	4	4	2
G12	paracarinoma tissue	1	1	4	4	2		G11	cancer	1	0.75	3	3	1
G14	paracarinoma tissue	0		0	0	1		G13	cancer	1	1	4	4	2
G16	paracarinoma tissue	1	0.6	3	3	1		G15	cancer	0		0	0	1
G18	paracarinoma tissue	1	0.7	3	3	1		G17	cancer	1	0.75	3	3	1
H02	paracarinoma tissue	1	0.5	2	2	1		H01	cancer	1	1	4	4	2
H04	paracarinoma tissue	0		0	0	1		H03	cancer	1	0.8	4	4	2
H06	paracarinoma tissue	1	0.1	1	1	1		H05	cancer	0		0	0	1
H08	paracarinoma tissue	0		0	0	1		H07	cancer	1	1	4	4	2
H10	paracarinoma tissue	1	0.6	3	3	1		H09	cancer	0		0	0	1
H12	paracarinoma tissue	1	0.6	3	3	1		H11	cancer	2	0.7	3	6	2
H14	paracarinoma tissue	2	0.4	1	2	1		H13	cancer	0		0	0	1
H18	paracarinoma tissue	1	0.4	2	2	1		H17	cancer	2	1	4	8	2
I02	paracarinoma tissue	2	1	4	8	2		I01	cancer	0		0	0	1
I04	paracarinoma tissue	1	0.9	4	4	2		I03	cancer	2	0.3	2	4	2
I06	paracarinoma tissue	1	0.2	1	1	1		I05	cancer	1	0.8	4	4	2
I08	paracarinoma tissue	1	1	4	4	2		I07	cancer	3	1	4	12	2
I10	paracarinoma tissue	1	0.7	3	3	1		I09	cancer	2	1	4	8	2
I12	paracarinoma tissue	1	1	4	4	2		I11	cancer	2	1	4	8	2
I14	paracarinoma tissue	0		0	0	1		I13	cancer	0		0	0	1
I16	paracarinoma tissue	0		0	0	1		I15	cancer	2	0.5	2	4	2
I18	paracarinoma tissue	0		0	0	1		I17	cancer	2	1	4	8	2
J02	paracarinoma tissue	1	1	4	4	2		J01	cancer	2	1	4	8	2
J04	paracarinoma tissue	1	0.6	3	3	1		J03	cancer	0		0	0	1
J06	paracarinoma tissue	3	0.5	2	6	2		J05	cancer	2	1	4	8	2
J08	paracarinoma tissue	0		0	0	1		J07	cancer	1	0.8	4	4	2
J10	paracarinoma tissue	1	0.6	3	3	1		J09	cancer	1	1	4	4	2
J12	paracarinoma tissue	1	1	4	4	2		J11	cancer	1	0.75	3	3	1
J14	paracarinoma tissue	0		0	0	1		J13	cancer	0		0	0	1
J18	paracarinoma tissue	0		0	0	1		J17	cancer	1	0.8	4	4	2
