# Supplementary material for: RAD51 expression and prognostic impact in patients with stomach adenocarcinoma
Source: PeerJ journal article supplement (doi:10.7717/peerj.19179), 2025-04-11
Supplement: supplementary_file.docx [file supplementary_file.docx]

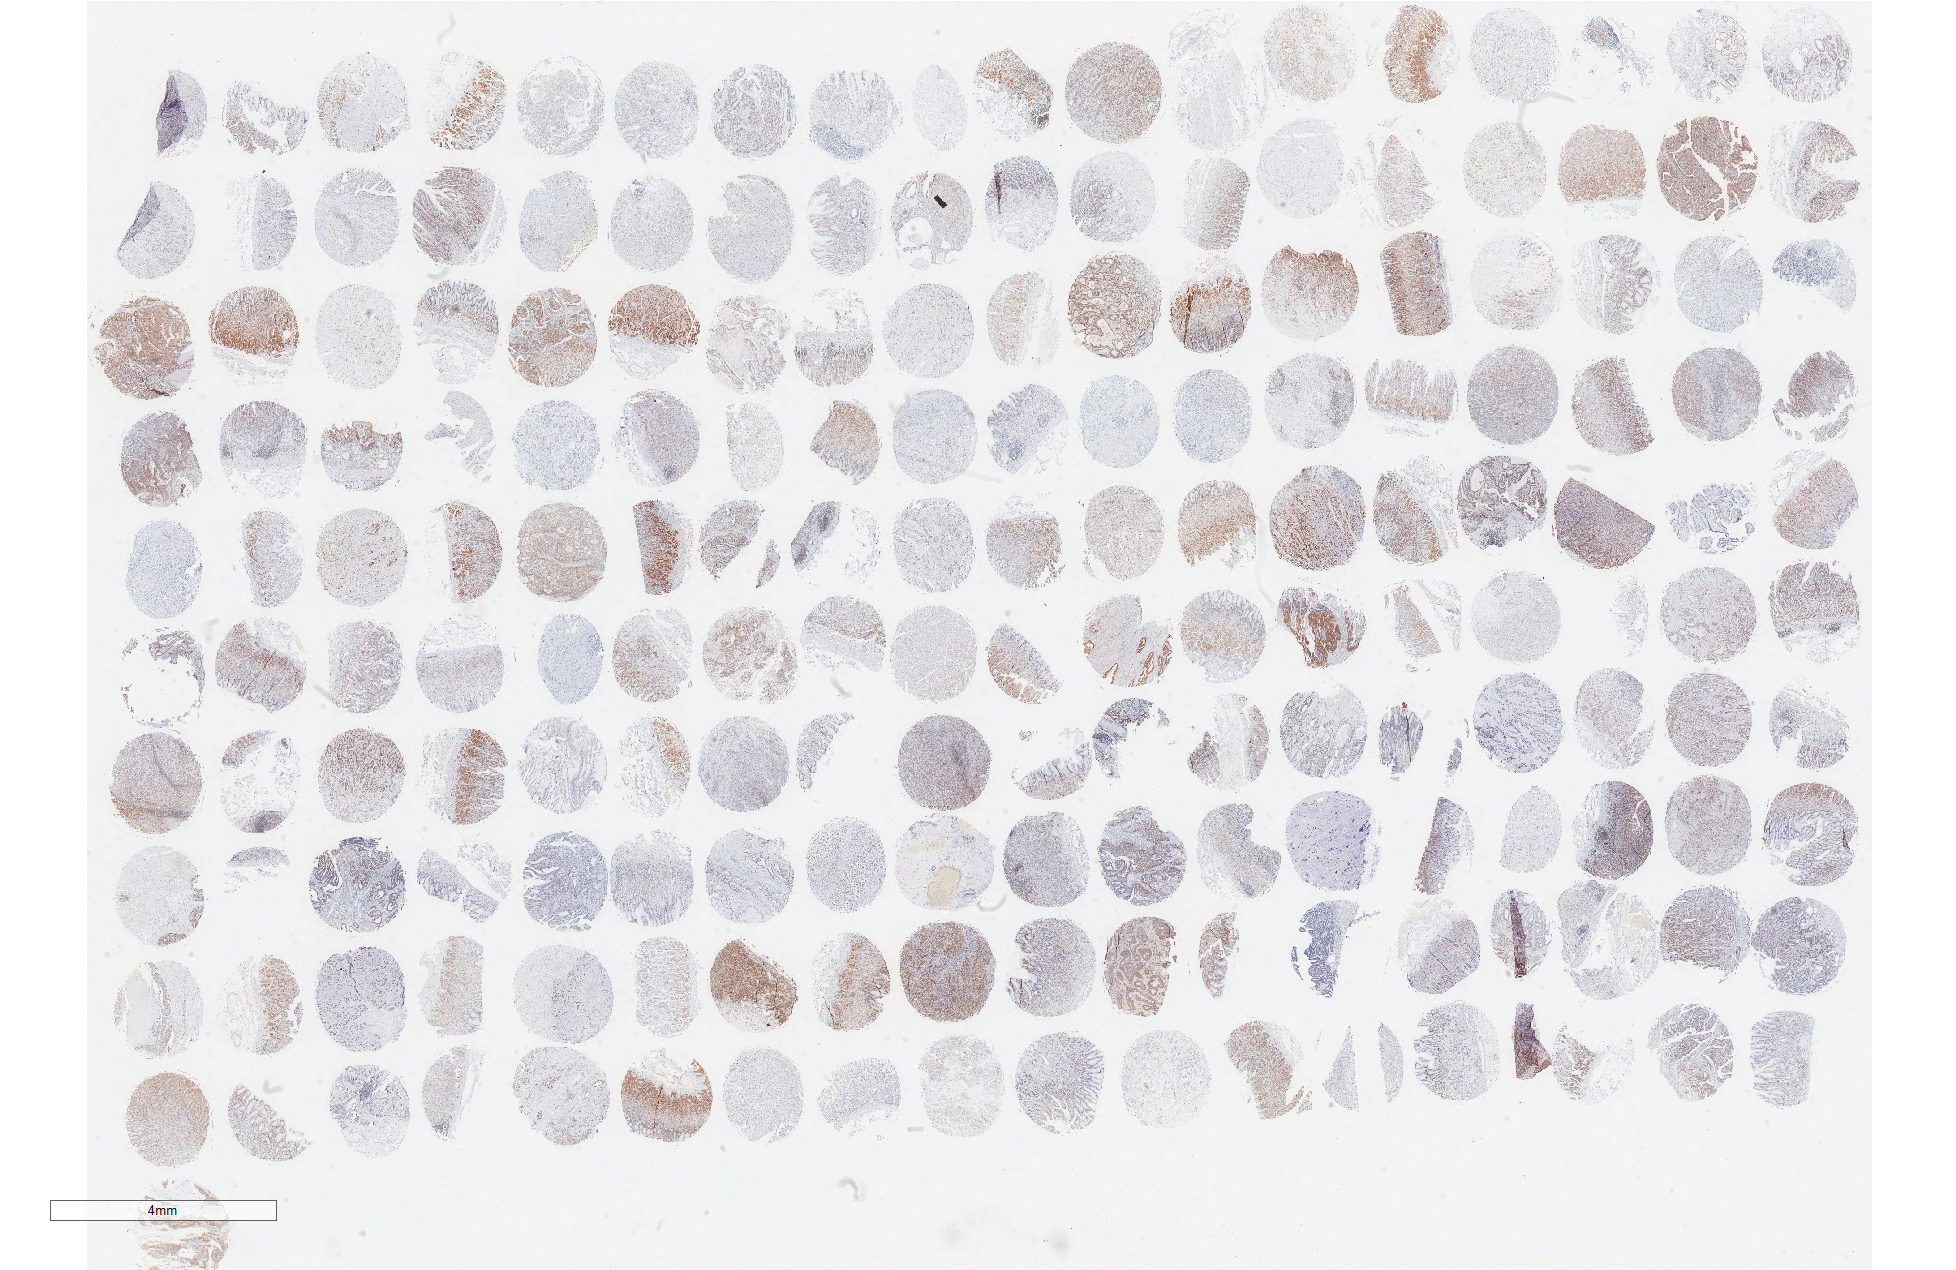


Table I. Differential expression of RAD51 in cancerous and gastric tissues：

|  | n | | RAD51 expression | | Chi-square  Value | p value |
| --- | --- | --- | --- | --- | --- | --- |
|  |  | | High(%) | Low(%) |  |
| Gastric carcinoma | | 85 | 63 | 25 | 5.442 | 0.020 |
| Gastric tissues | | 85 | 23 | 65 |  |  |

* Statistically significant (p < 0.05)
